# Supplementary material
Source: publisher site journal article supplement (https://newproduction.spandidos-publications.com/6107/downloadSupplementary)
Supplement: Supplementary file 1 [file downloadSupplementary]

Table SI. Primers used to amplify the indicated genes.

| Gene  | Reverse transcription-quantitative PCR primers |                            |
|-------|------------------------------------------------|----------------------------|
|       | Forward Sequence (5' -3' )                     | Reverse sequence (5' -3' ) |
| TPR   | AACGCCAGCGTGAGGAATATG                          | ATTACGTGGTTACCCCTTGCT      |
| GAPDH | ACAGTCAGCCGCATCTTCTT                           | GACAAGCTTCCCGTTCTCAG       |

Table SII. Antibodies used in western blotting

| Antibody target      | Vendor                    | Cat.no.  |
|----------------------|---------------------------|----------|
| TPR                  | Abcam                     | ab170940 |
| phospho-AKT (S473)   | CST                       | 4060     |
| AKT                  | CST                       | 9272     |
| GAPDH                | CST                       | 2118     |
| Goat anti-rabbit IgG | Bioworld Technology, Inc. | bs13278  |

Table SIII. Association between the expression of TPR and the clinicopathological characteristics of patients

| Characteristics           | Low expression of TPR | High expression of TPR | P-value |
|---------------------------|-----------------------|------------------------|---------|
| n                         | 187                   | 187                    |         |
| T stage, n (%)            |                       |                        | 0.813   |
| T1                        | 92 (24.8%)            | 91 (24.5%)             |         |
| T2                        | 49 (13.2%)            | 46 (12.4%)             |         |
| T3                        | 36 (9.7%)             | 44 (11.9%)             |         |
| T4                        | 7 (1.9%)              | 6 (1.6%)               |         |
| N stage, n (%)            |                       |                        | 0.624   |
| N0                        | 121 (46.9%)           | 133 (51.6%)            |         |
| N1                        | 1 (0.4%)              | 3 (1.2%)               |         |
| M stage, n (%)            |                       |                        | 0.365   |
| M0                        | 131 (48.2%)           | 137 (50.4%)            |         |
| M1                        | 3 (1.1%)              | 1 (0.4%)               |         |
| Pathologic stage, n (%)   |                       |                        | 0.294   |
| Stage I                   | 87 (24.9%)            | 86 (24.6%)             |         |
| Stage II                  | 47 (13.4%)            | 40 (11.4%)             |         |
| Stage III                 | 37 (10.6%)            | 48 (13.7%)             |         |
| Stage IV                  | 4 (1.1%)              | 1 (0.3%)               |         |
| Tumor status, n (%)       |                       |                        | 0.226   |
| Tumor free                | 108 (30.4%)           | 94 (26.5%)             |         |
| With tumor                | 71 (20%)              | 82 (23.1%)             |         |
| Sex, n (%)                |                       |                        | 0.269   |
| Female                    | 55 (14.7%)            | 66 (17.6%)             |         |
| Male                      | 132 (35.3%)           | 121 (32.4%)            |         |
| Race, n (%)               |                       |                        | 0.815   |
| Asian                     | 76 (21%)              | 84 (23.2%)             |         |
| Black or African American | 8 (2.2%)              | 9 (2.5%)               |         |
| White                     | 94 (26%)              | 91 (25.1%)             |         |
| Residual tumor, n (%)     |                       |                        | 0.086   |
| R0                        | 168 (48.7%)           | 159 (46.1%)            |         |
| R1                        | 5 (1.4%)              | 12 (3.5%)              |         |
| R2                        | 1 (0.3%)              | 0 (0%)                 |         |
| Histologic grade, n (%)   |                       |                        | 0.046   |

|                                             |                      |                     |       |
|---------------------------------------------|----------------------|---------------------|-------|
| G1                                          | 35 (9.5%)            | 20 (5.4%)           |       |
| G2                                          | 93 (25.2%)           | 85 (23%)            |       |
| G3                                          | 52 (14.1%)           | 72 (19.5%)          |       |
| G4                                          | 5 (1.4%)             | 7 (1.9%)            |       |
| Adjacent hepatic tissue inflammation, n (%) |                      |                     | 0.200 |
| None                                        | 67 (28.3%)           | 51 (21.5%)          |       |
| Mild                                        | 48 (20.3%)           | 53 (22.4%)          |       |
| Severe                                      | 12 (5.1%)            | 6 (2.5%)            |       |
| Child-Pugh grade, n (%)                     |                      |                     | 0.168 |
| A                                           | 122 (50.6%)          | 97 (40.2%)          |       |
| B                                           | 8 (3.3%)             | 13 (5.4%)           |       |
| C                                           | 1 (0.4%)             | 0 (0%)              |       |
| Fibrosis ishak score, n (%)                 |                      |                     | 0.540 |
| 0                                           | 45 (20.9%)           | 30 (14%)            |       |
| 1/2                                         | 19 (8.8%)            | 12 (5.6%)           |       |
| 3/4                                         | 14 (6.5%)            | 14 (6.5%)           |       |
| 5/6                                         | 41 (19.1%)           | 40 (18.6%)          |       |
| Vascular invasion, n (%)                    |                      |                     | 0.285 |
| No                                          | 111 (34.9%)          | 97 (30.5%)          |       |
| Yes                                         | 51 (16%)             | 59 (18.6%)          |       |
| Age, median (IQR)                           | 63 (53.25, 69)       | 59 (51, 68)         | 0.042 |
| Height, median (IQR)                        | 168 (162, 174.75)    | 166 (160, 172)      | 0.039 |
| Weight, median (IQR)                        | 72 (62, 84)          | 68 (57, 79)         | 0.034 |
| BMI, median (IQR)                           | 24.88 (22.38, 28.67) | 24.3 (21.21, 28.65) | 0.260 |
| AFP (ng/ml), median (IQR)                   | 11 (4, 112)          | 24 (4.5, 820)       | 0.054 |
| Albumin(g/dl), median (IQR)                 | 4 (3.5, 4.3)         | 4 (3.5, 4.4)        | 0.076 |
| Prothrombin time, median (IQR)              | 1.1 (1, 9.1)         | 1.1 (1, 9.38)       | 0.603 |

Categorical variables are expressed as frequencies and percentages. Continuous variables, including parametric and nonparametric variables, are indicated as the mean  $\pm$  standard deviation (SD) and median with interquartile range, respectively. TPR, translocated promoter region.
